# Supplementary material
Source: Research Square preprint supplement (doi:10.21203/rs.3.rs-9949762/v1)
Supplement: Supplementary file 1 [file b742678dc90b35bc2fa3cd24.docx]

**Dual-Mode Deep-Ultraviolet Photodetection and neuromorphic vision sensor via Thermal Engineering of Oxygen Vacancies in Ga2O3 ​**

**Zichen Qi1, Hao Zhang1, Lin Zhu2,*, Liyong Jiang1,* and Yanqiang Cao1,***

1Institute of Micro-nano Photonics and Quantum Manipulation, Engineering Research Center of Semiconductor Device Optoelectronic Hybrid Integration in Jiangsu Province, School of Physics, Nanjing University of Science and Technology, Nanjing, 210094, China

2School of Physics, Nanjing University, Nanjing, 210093, China

Correspondence to: yqcao@njust.edu.cn, jly@njust.edu.cn, zlin@nju.edu.cn


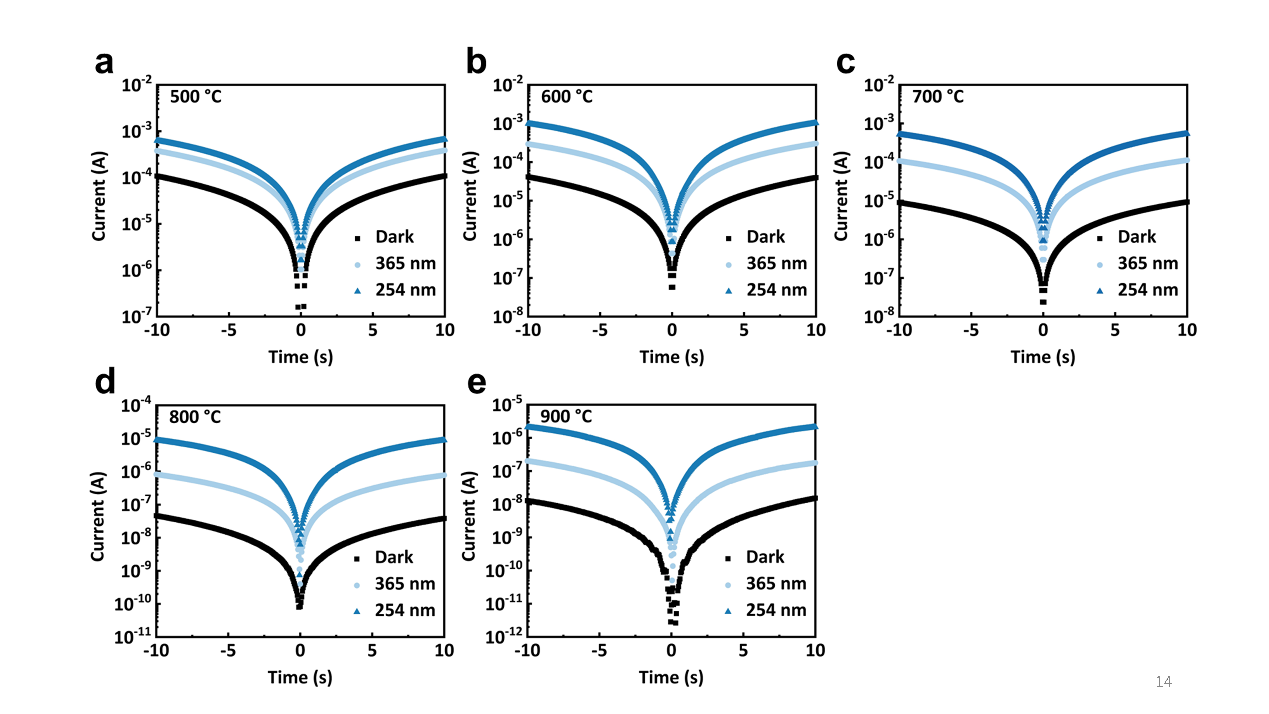


**Fig. S1** **Current-voltage characteristics of Ga2O3 films fabricated at different annealing temperatures. a** 500 °C. **b** 600 °C. **c** 700 °C. **d** 800 °C. **e** 900 °C


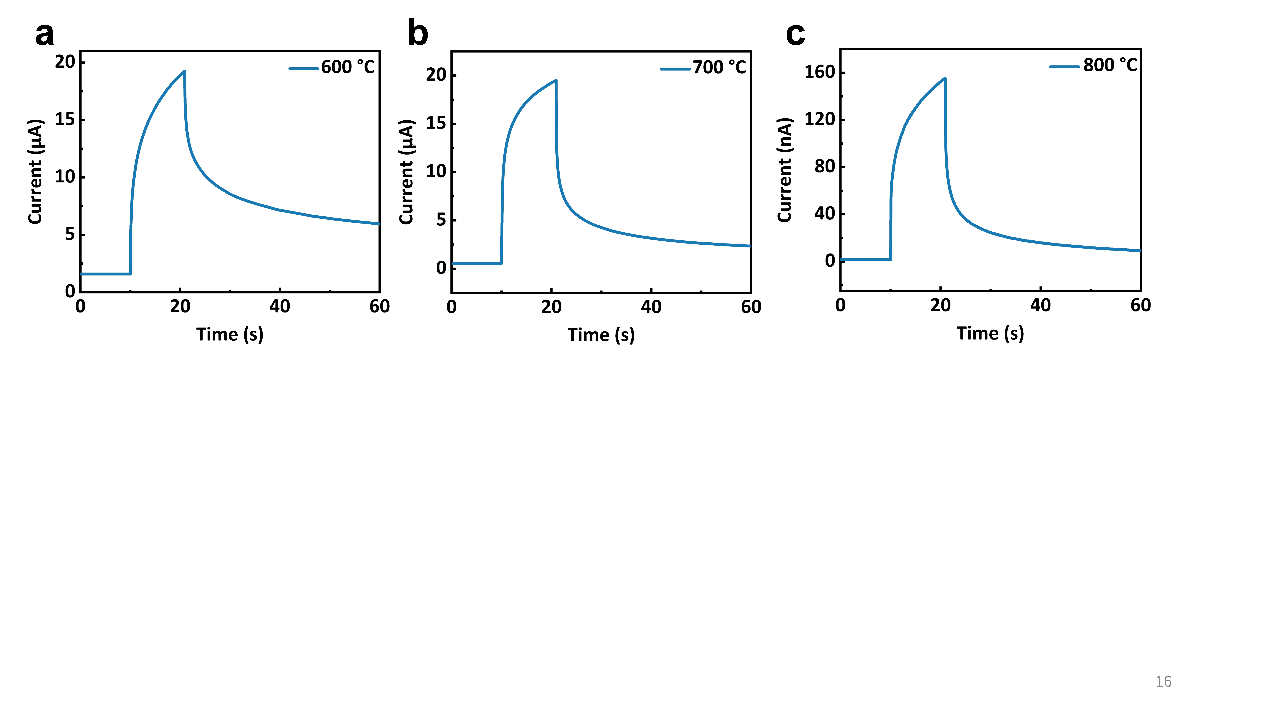


**Fig. S2 Current-time characteristics of Ga2O3 films fabricated at different annealing temperatures.** **a** 600 °C. **b** 700 °C. **c** 800 °C


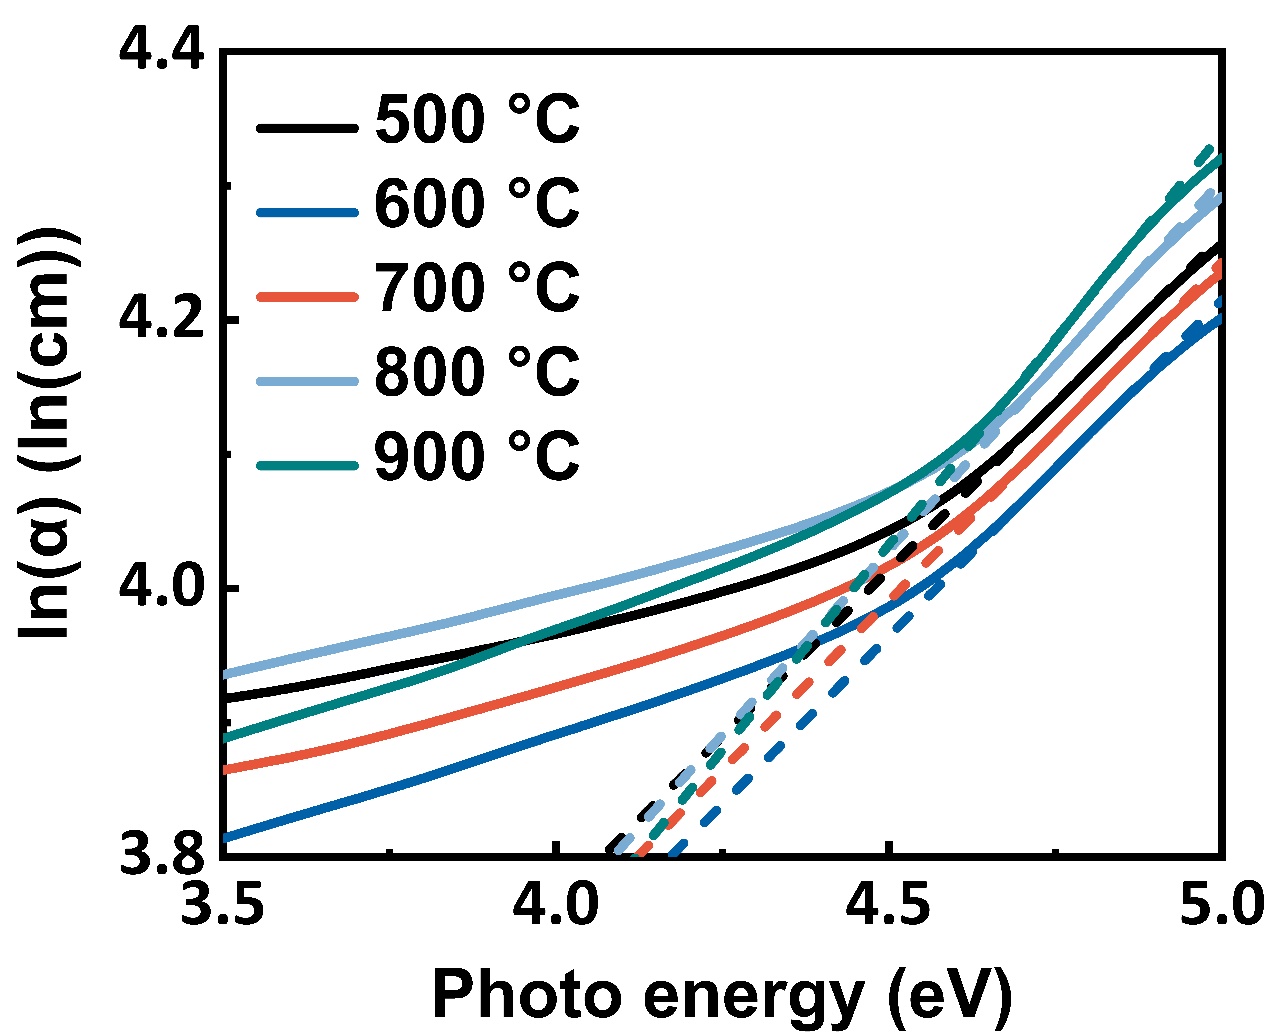


**Fig. S3 Urbach energy evaluation of Ga2O3 annealed at different temperatures.** The Urbach energy is extracted as the reciprocal slope of the linear regime in the logarithmic absorption coefficient versus photon energy plot. For films annealed at 500, 600, 700, 800, and 900 °C, the corresponding Urbach energies are 2.01, 2.00, 1.98, 1.81, and 1.63 eV, respectively. The progressive reduction in Urbach energy with increasing annealing temperature signifies improved crystalline order and a diminished density of band‑tail states, consistent with the X‑ray diffraction results.


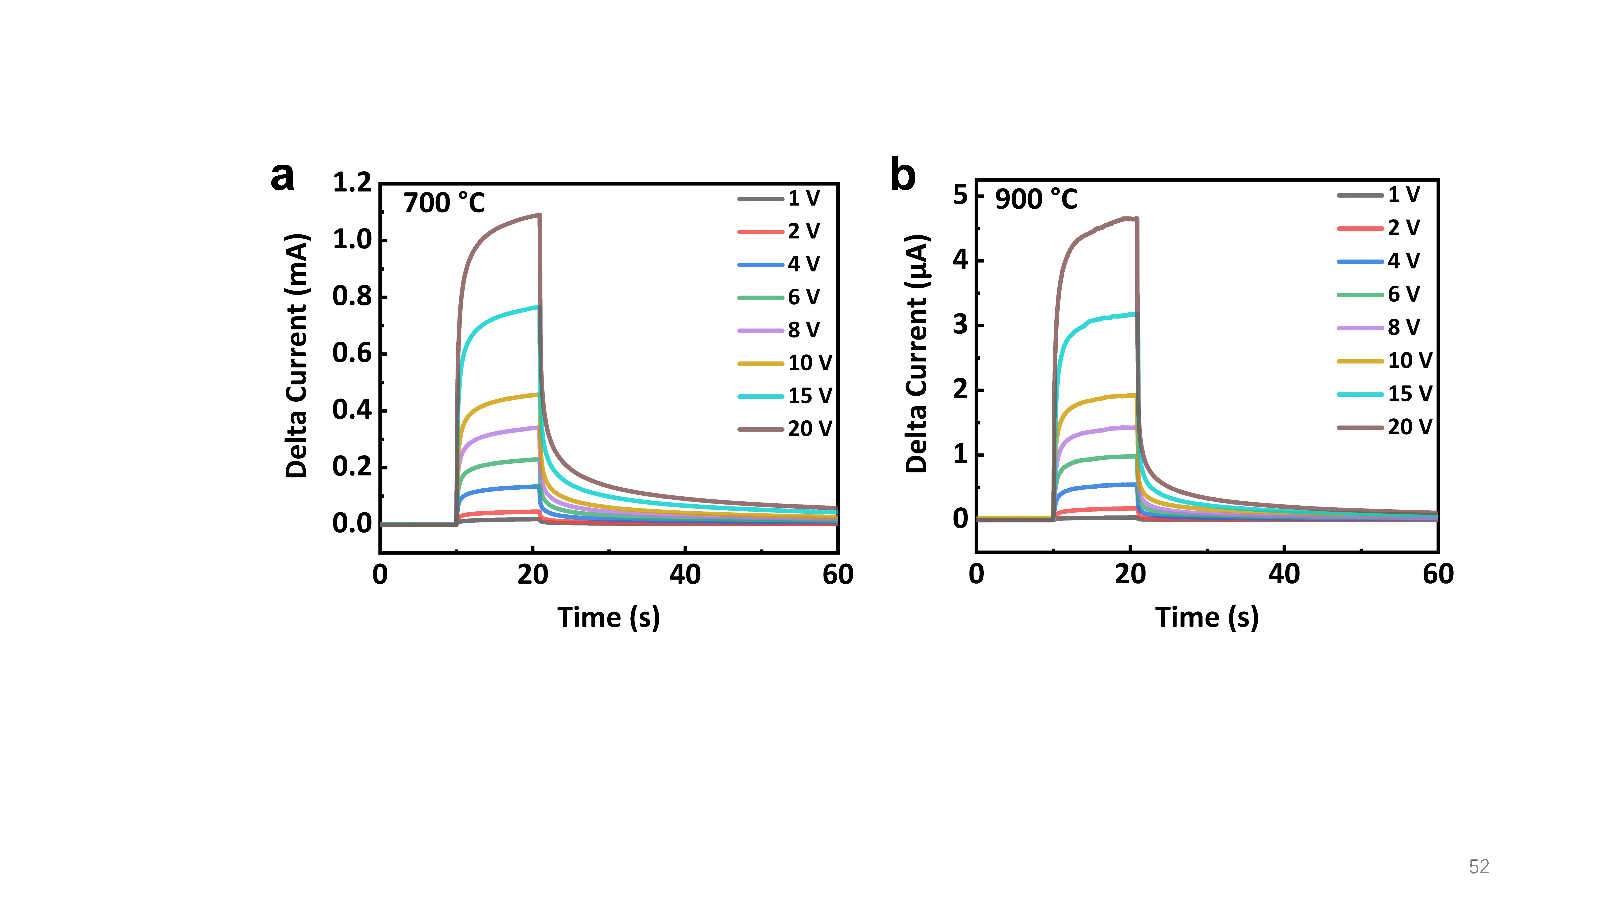


**Fig. S4 Current-time characteristics under varying bias voltages at 1.0 mW cm⁻² illumination for films annealed at elevated temperatures.** **a** 700 °C. **b** 900 °C


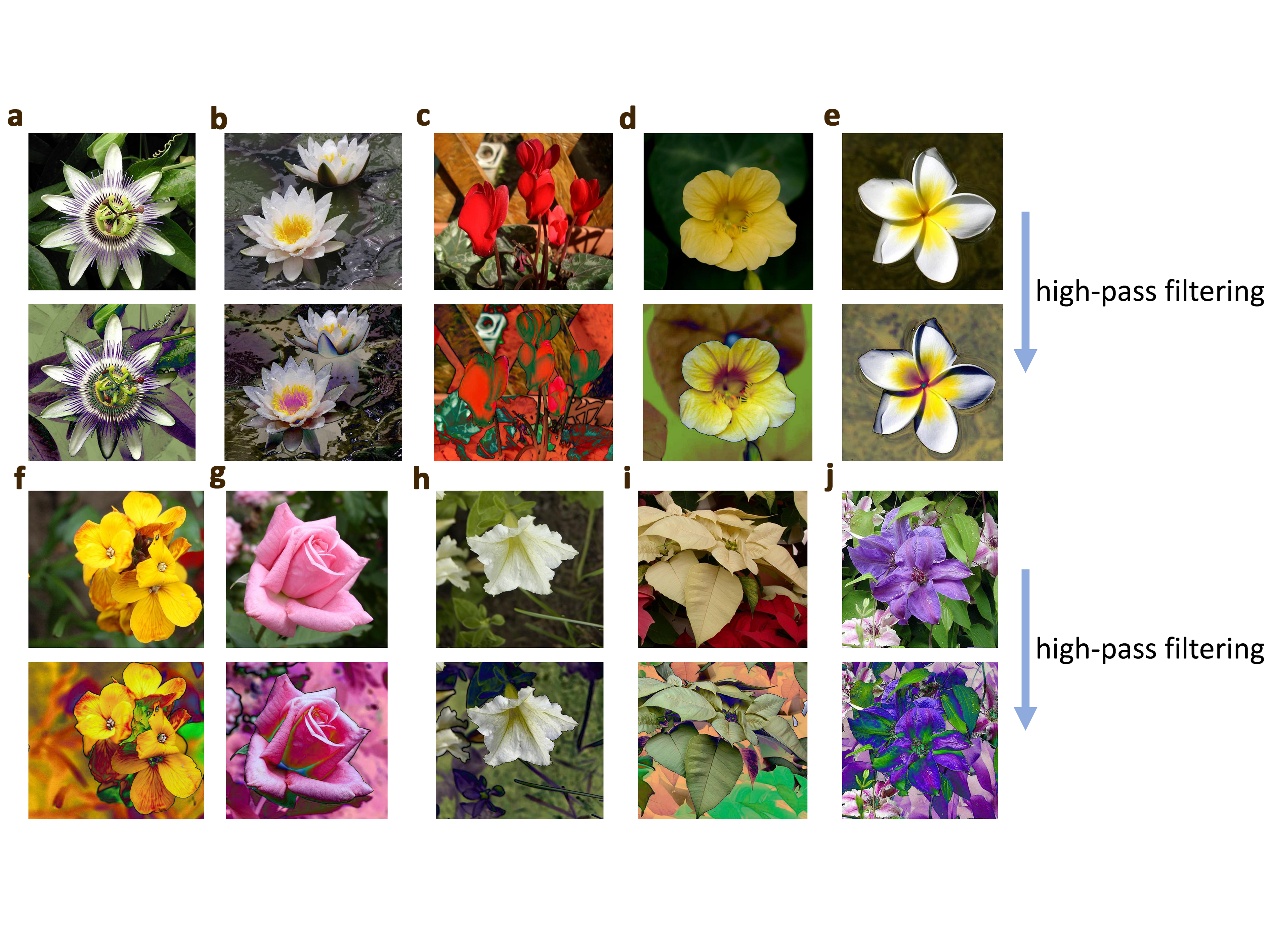


**Fig. S5 Image filtering of 10-flowers.** Samples of **a** passion flower. **b** frangipani. **c** foxglove. **d** water lily. **e** buttercup. **f** yellow iris. **g** rose. **h** morning glory. **i** poinsettia. **j** clematis
